# Supplementary material
Source: MDPI journal article supplement (https://www.mdpi.com/2073-4441/15/1/95)
Supplement: s1 [file s1]

Archive with 9 entries (9 files):
- Figure S1.jpg
- Figure S2.jpg
- Figure S3.jpg
- Figure S4.jpg
- Figure S5.jpg
- Figure S6.jpg
- Figure S7.jpg
- Figure S8.jpg
- SUPPLEMENTARY MATERIAL - V2.pdf
