# Supplementary material
Source: MDPI journal article supplement (https://www.mdpi.com/2073-4441/15/1/95)
Supplement: s1 [file s1 › SUPPLEMENTARY MATERIAL - V2.pdf]

## **SUPPLEMENTARY MATERIAL**

**Figure S1.** Results of the sequential aDN process. NLR R0, the beginning of the cycle (I), end of the nitrification phase and beginning of denitrification (N) and end of denitrification (D).

**Figure S2.** Results of the sequential aDN process. NLR R1, the beginning of the cycle (I), end of the nitrification phase and beginning of denitrification (N) and end of denitrification (D).

**Figure S3.** The variation of VSS over time in enrichment aDN process

**Figure S4.** The variation of VSS over time in sequential NT-aDN process.

**Figure S5.** Sulfate evolution in reactor R1.

**Figure S6.** sulfate evolution in reactor R0.

**Figure S7.** Nitrogen compounds in reactor R1.

**Figure S8.** Nitrogen compounds in reactor R0.
