# Supplementary material
Source: MDPI journal article supplement (https://www.mdpi.com/2073-4441/15/1/95)

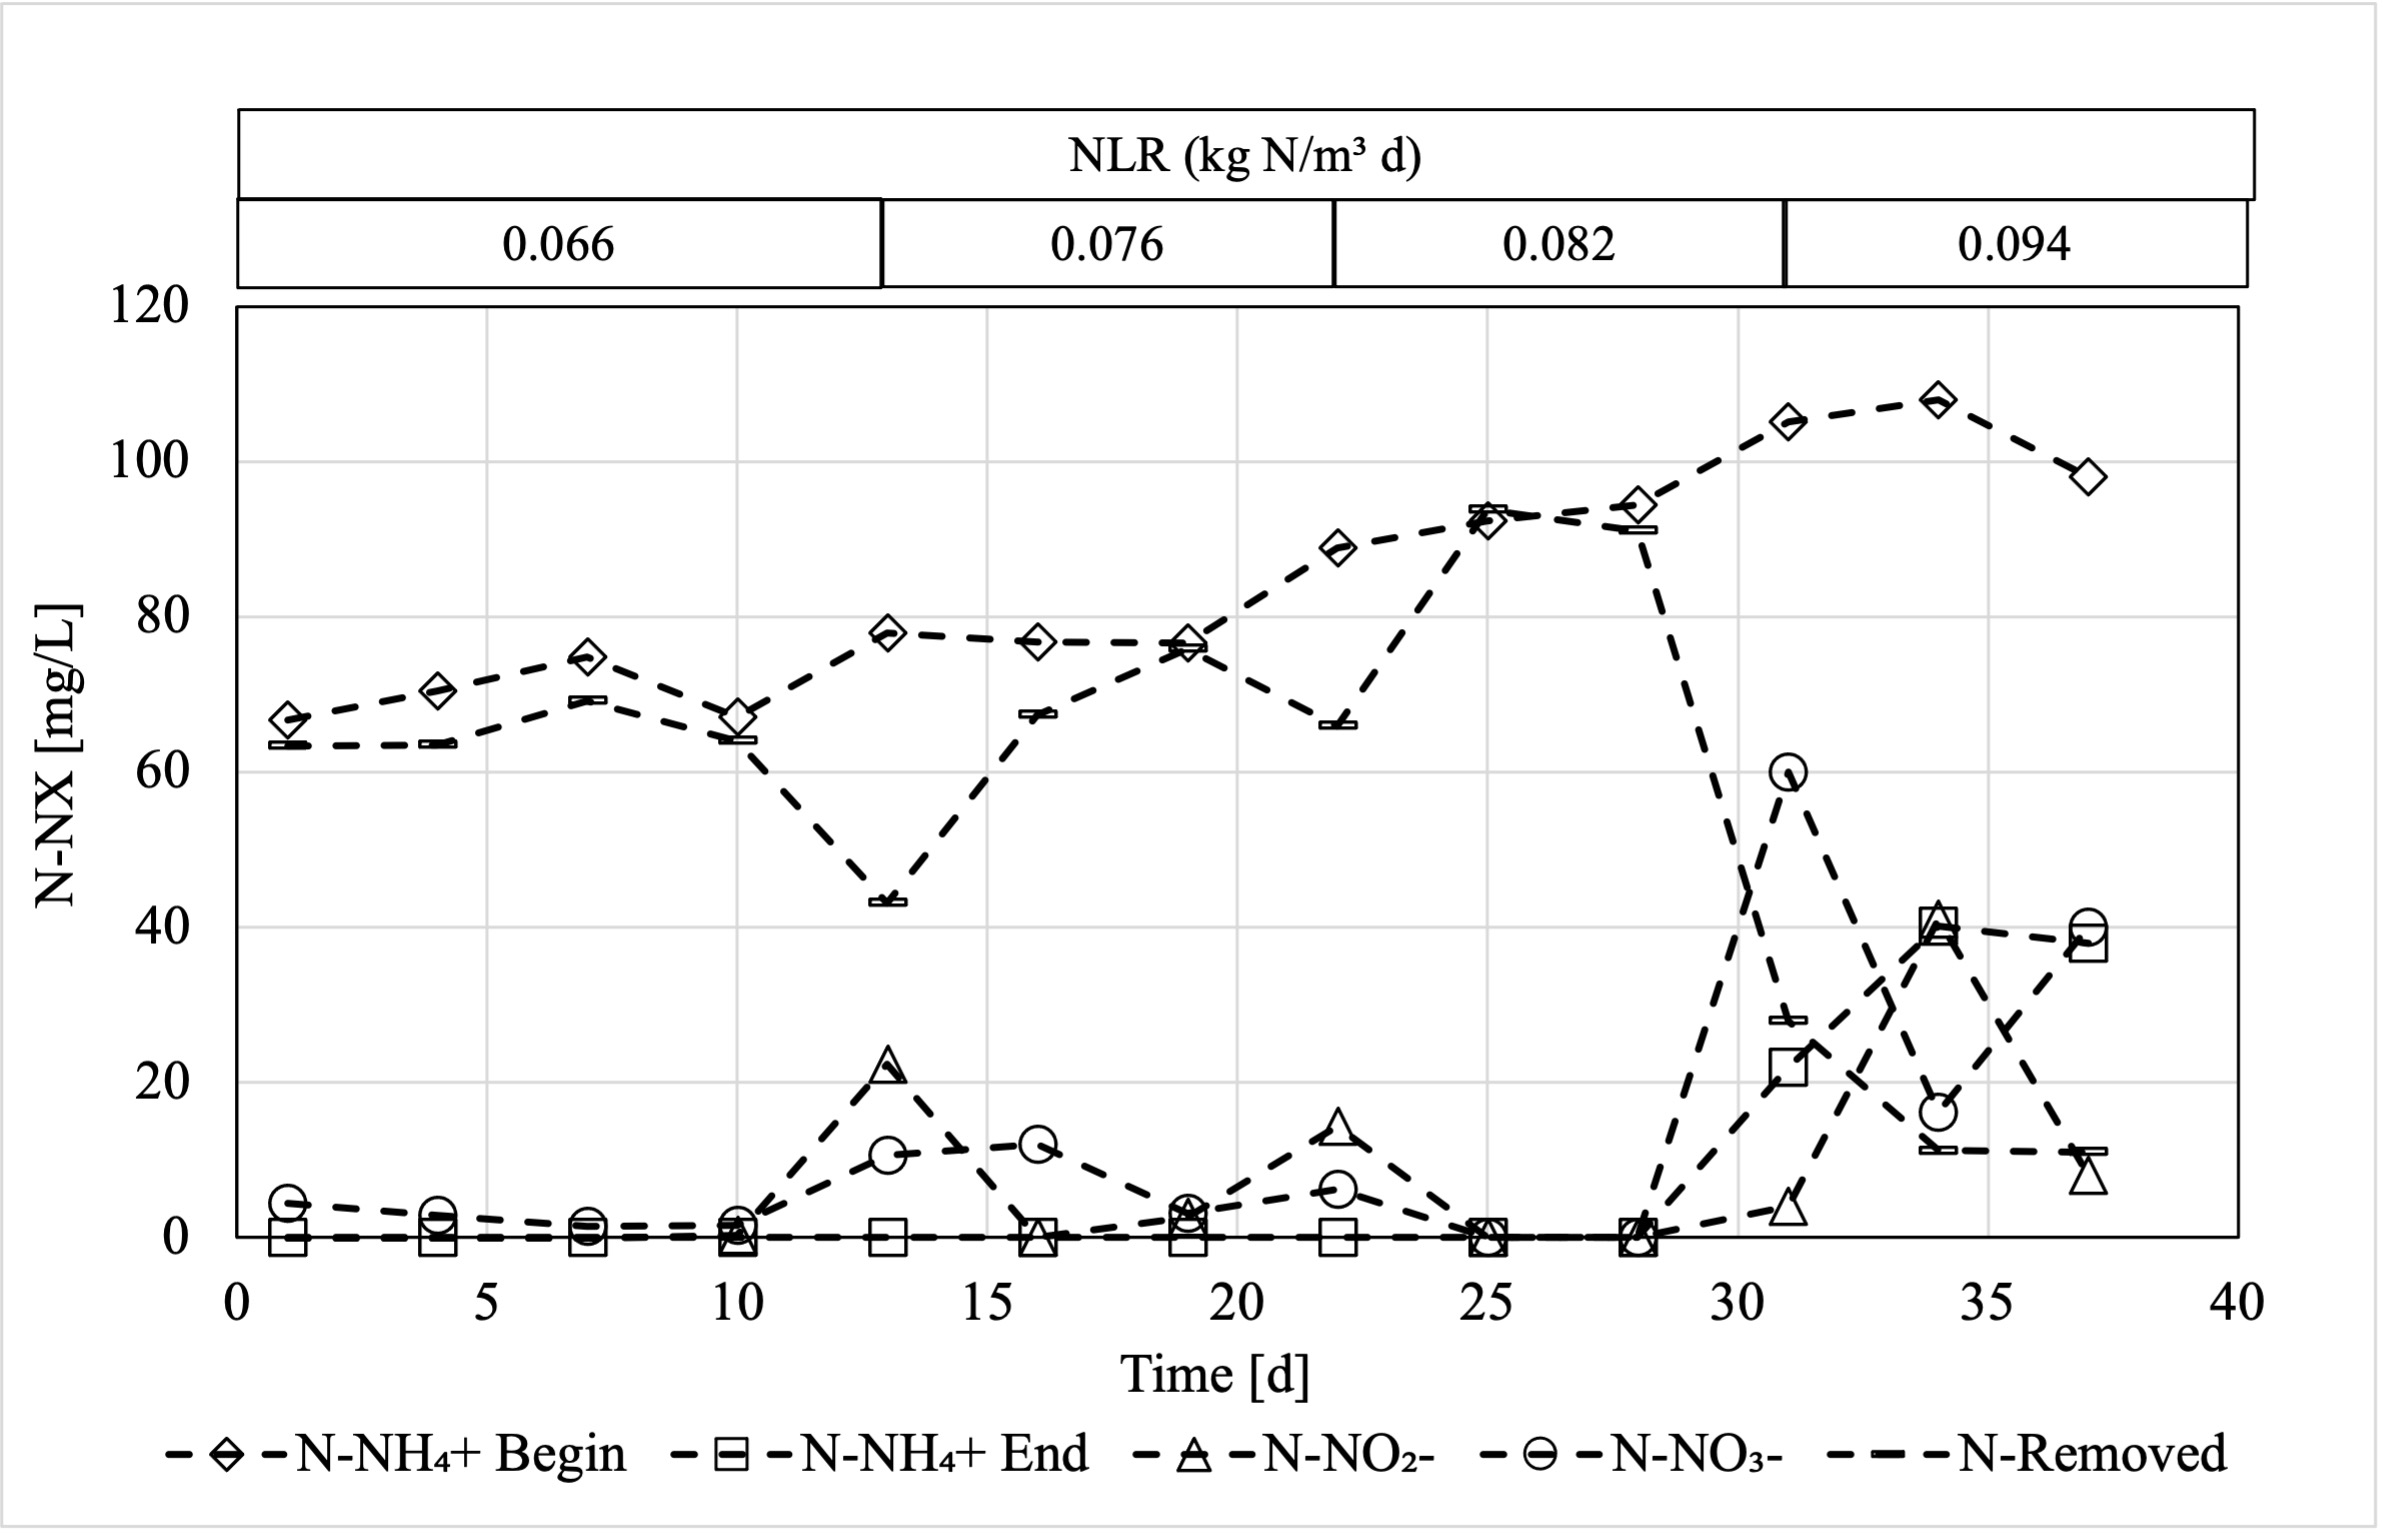

Supplement: s1 [file s1 › Figure S1.jpg]

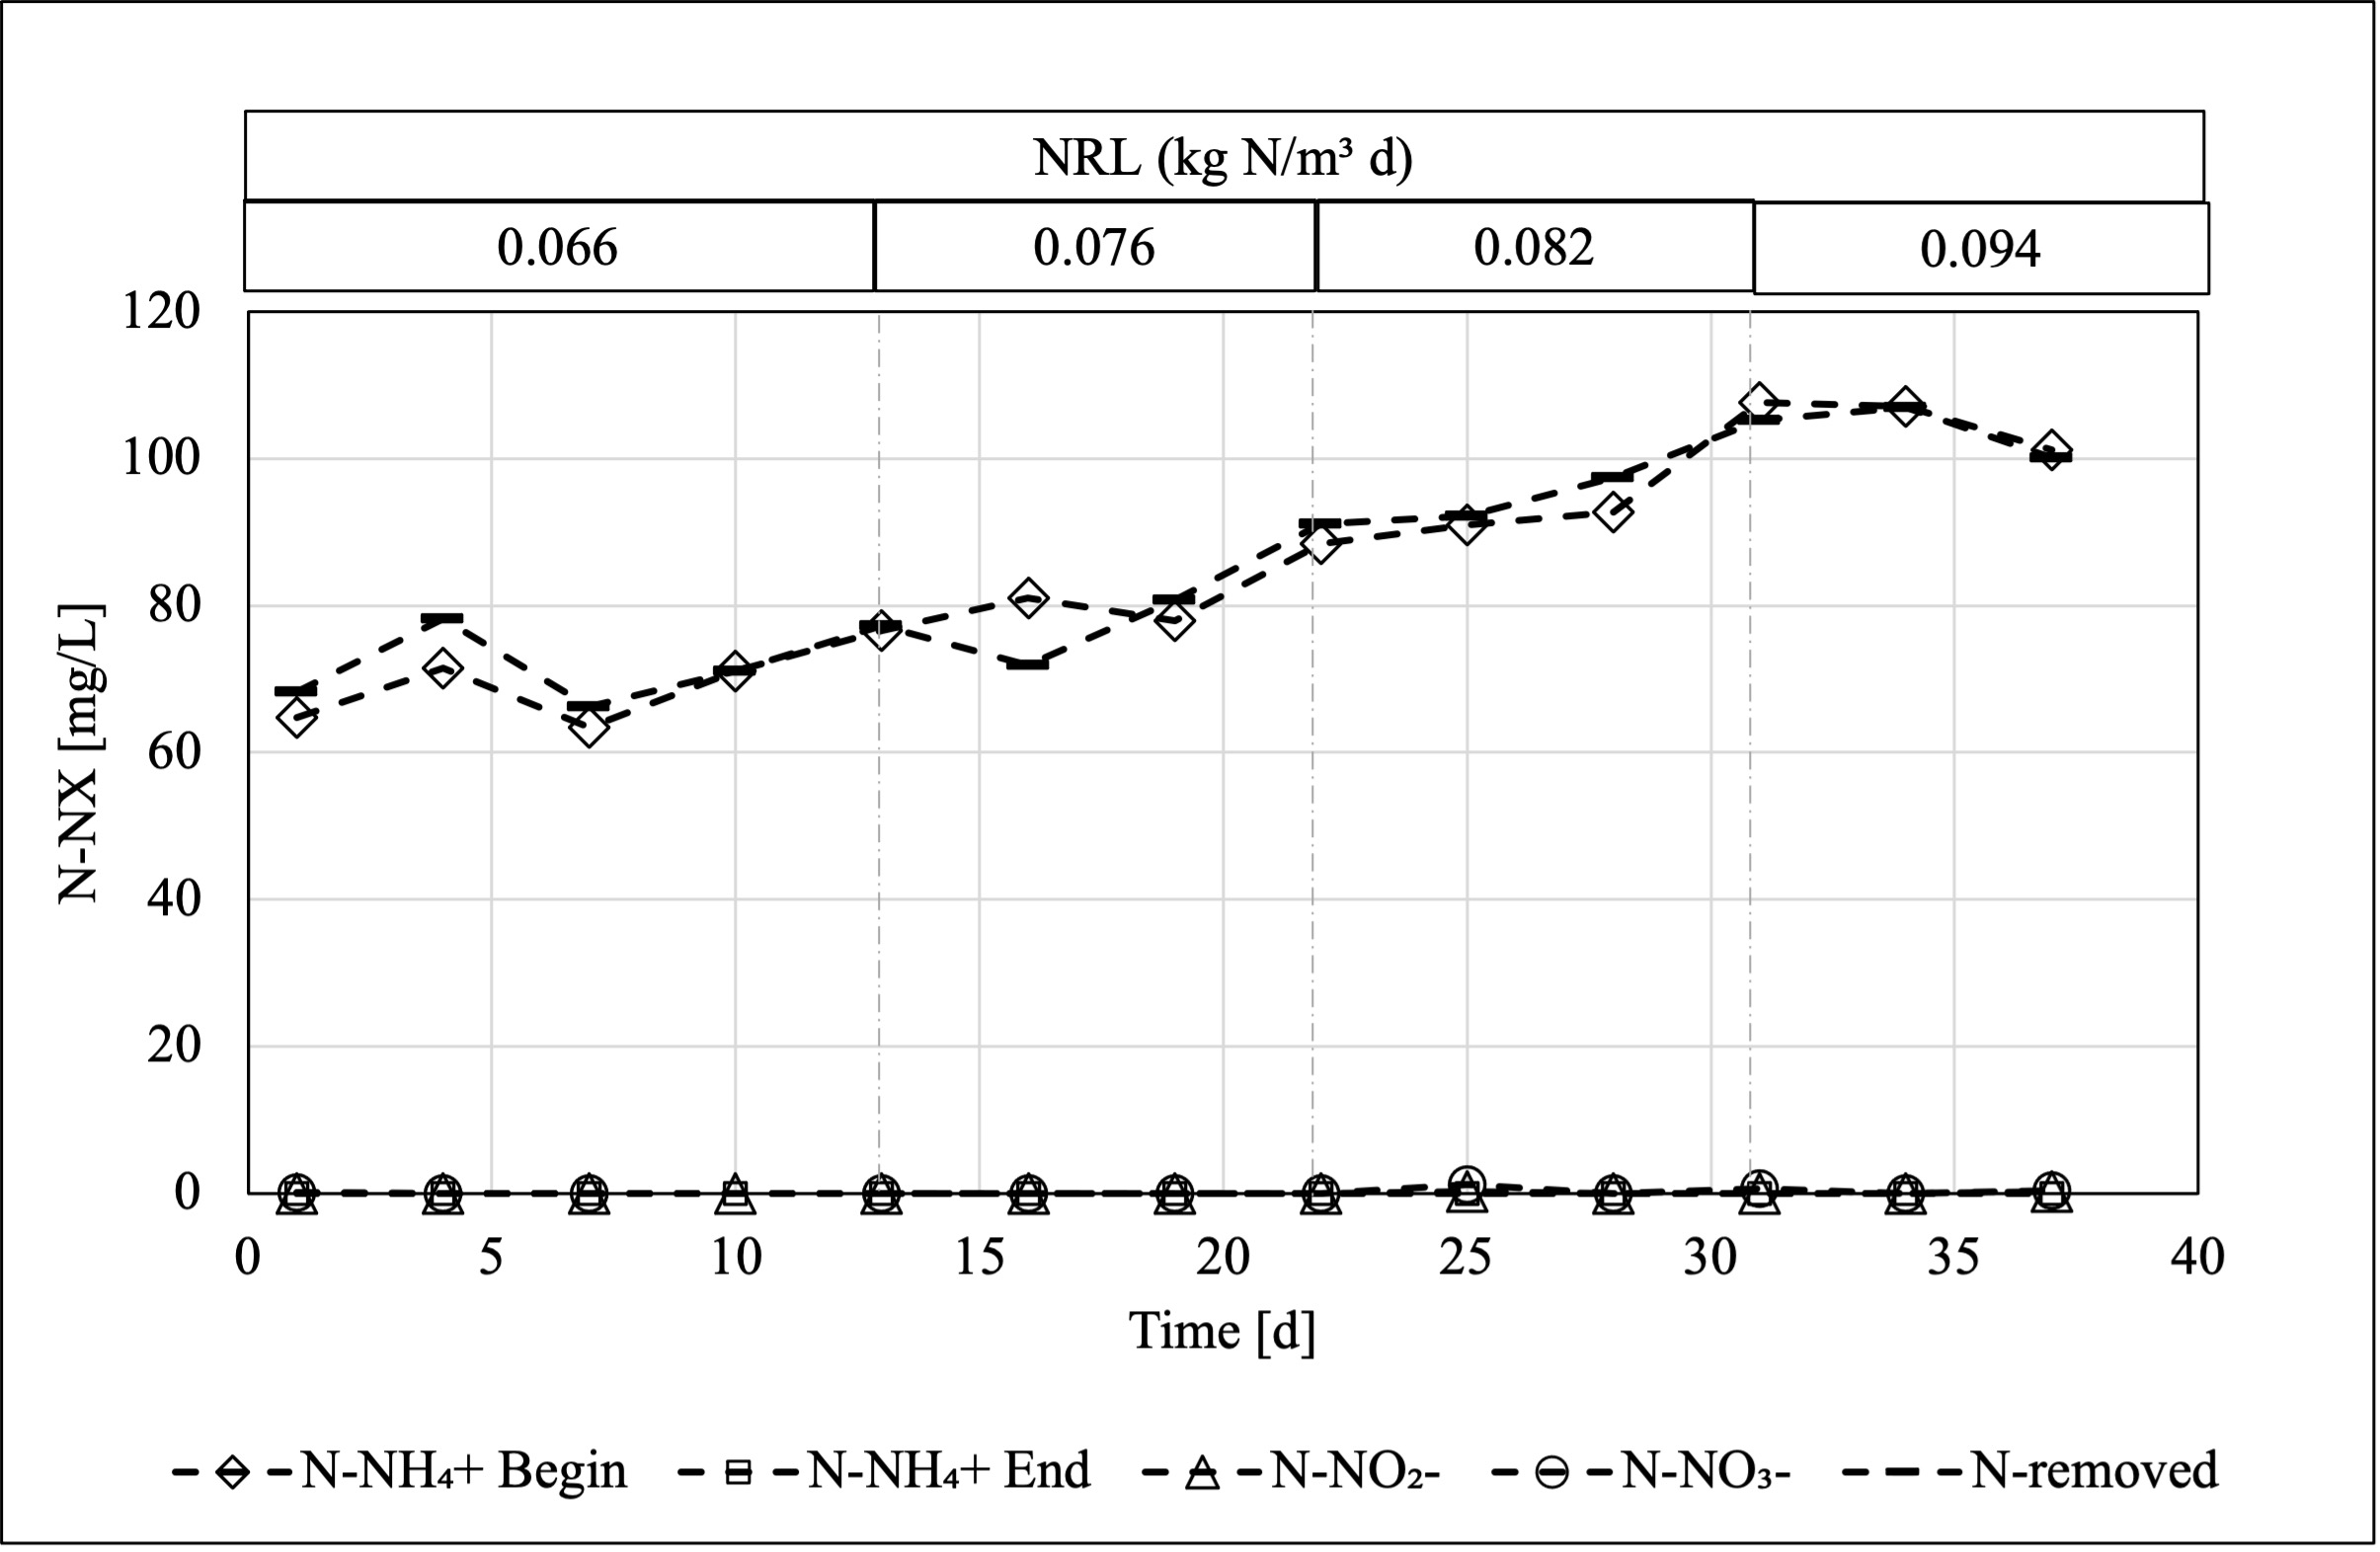

Supplement: s1 [file s1 › Figure S2.jpg]

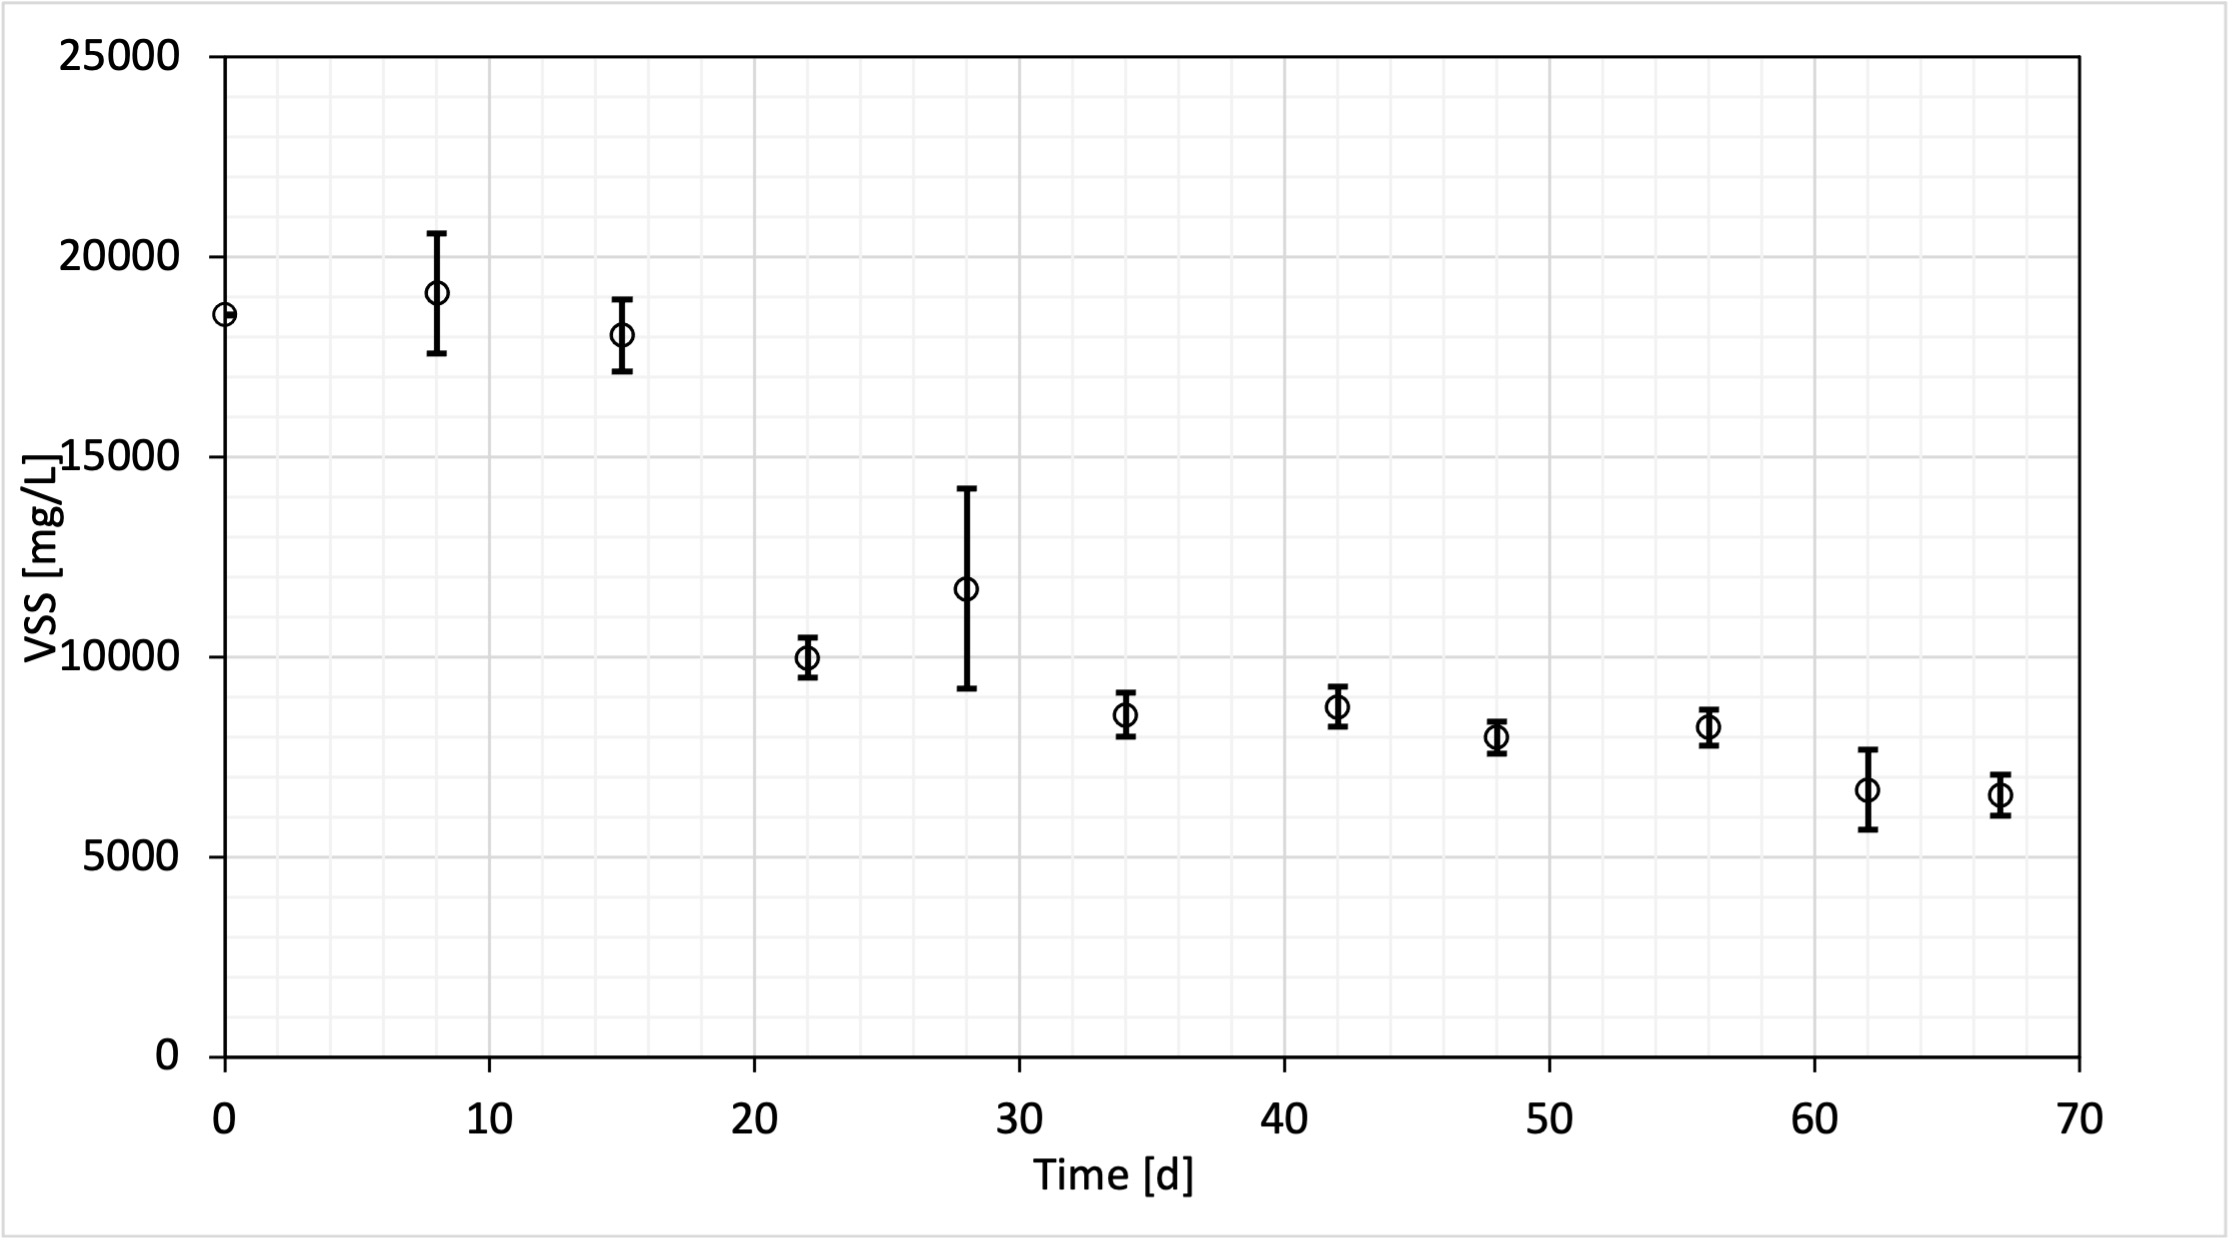

Supplement: s1 [file s1 › Figure S3.jpg]

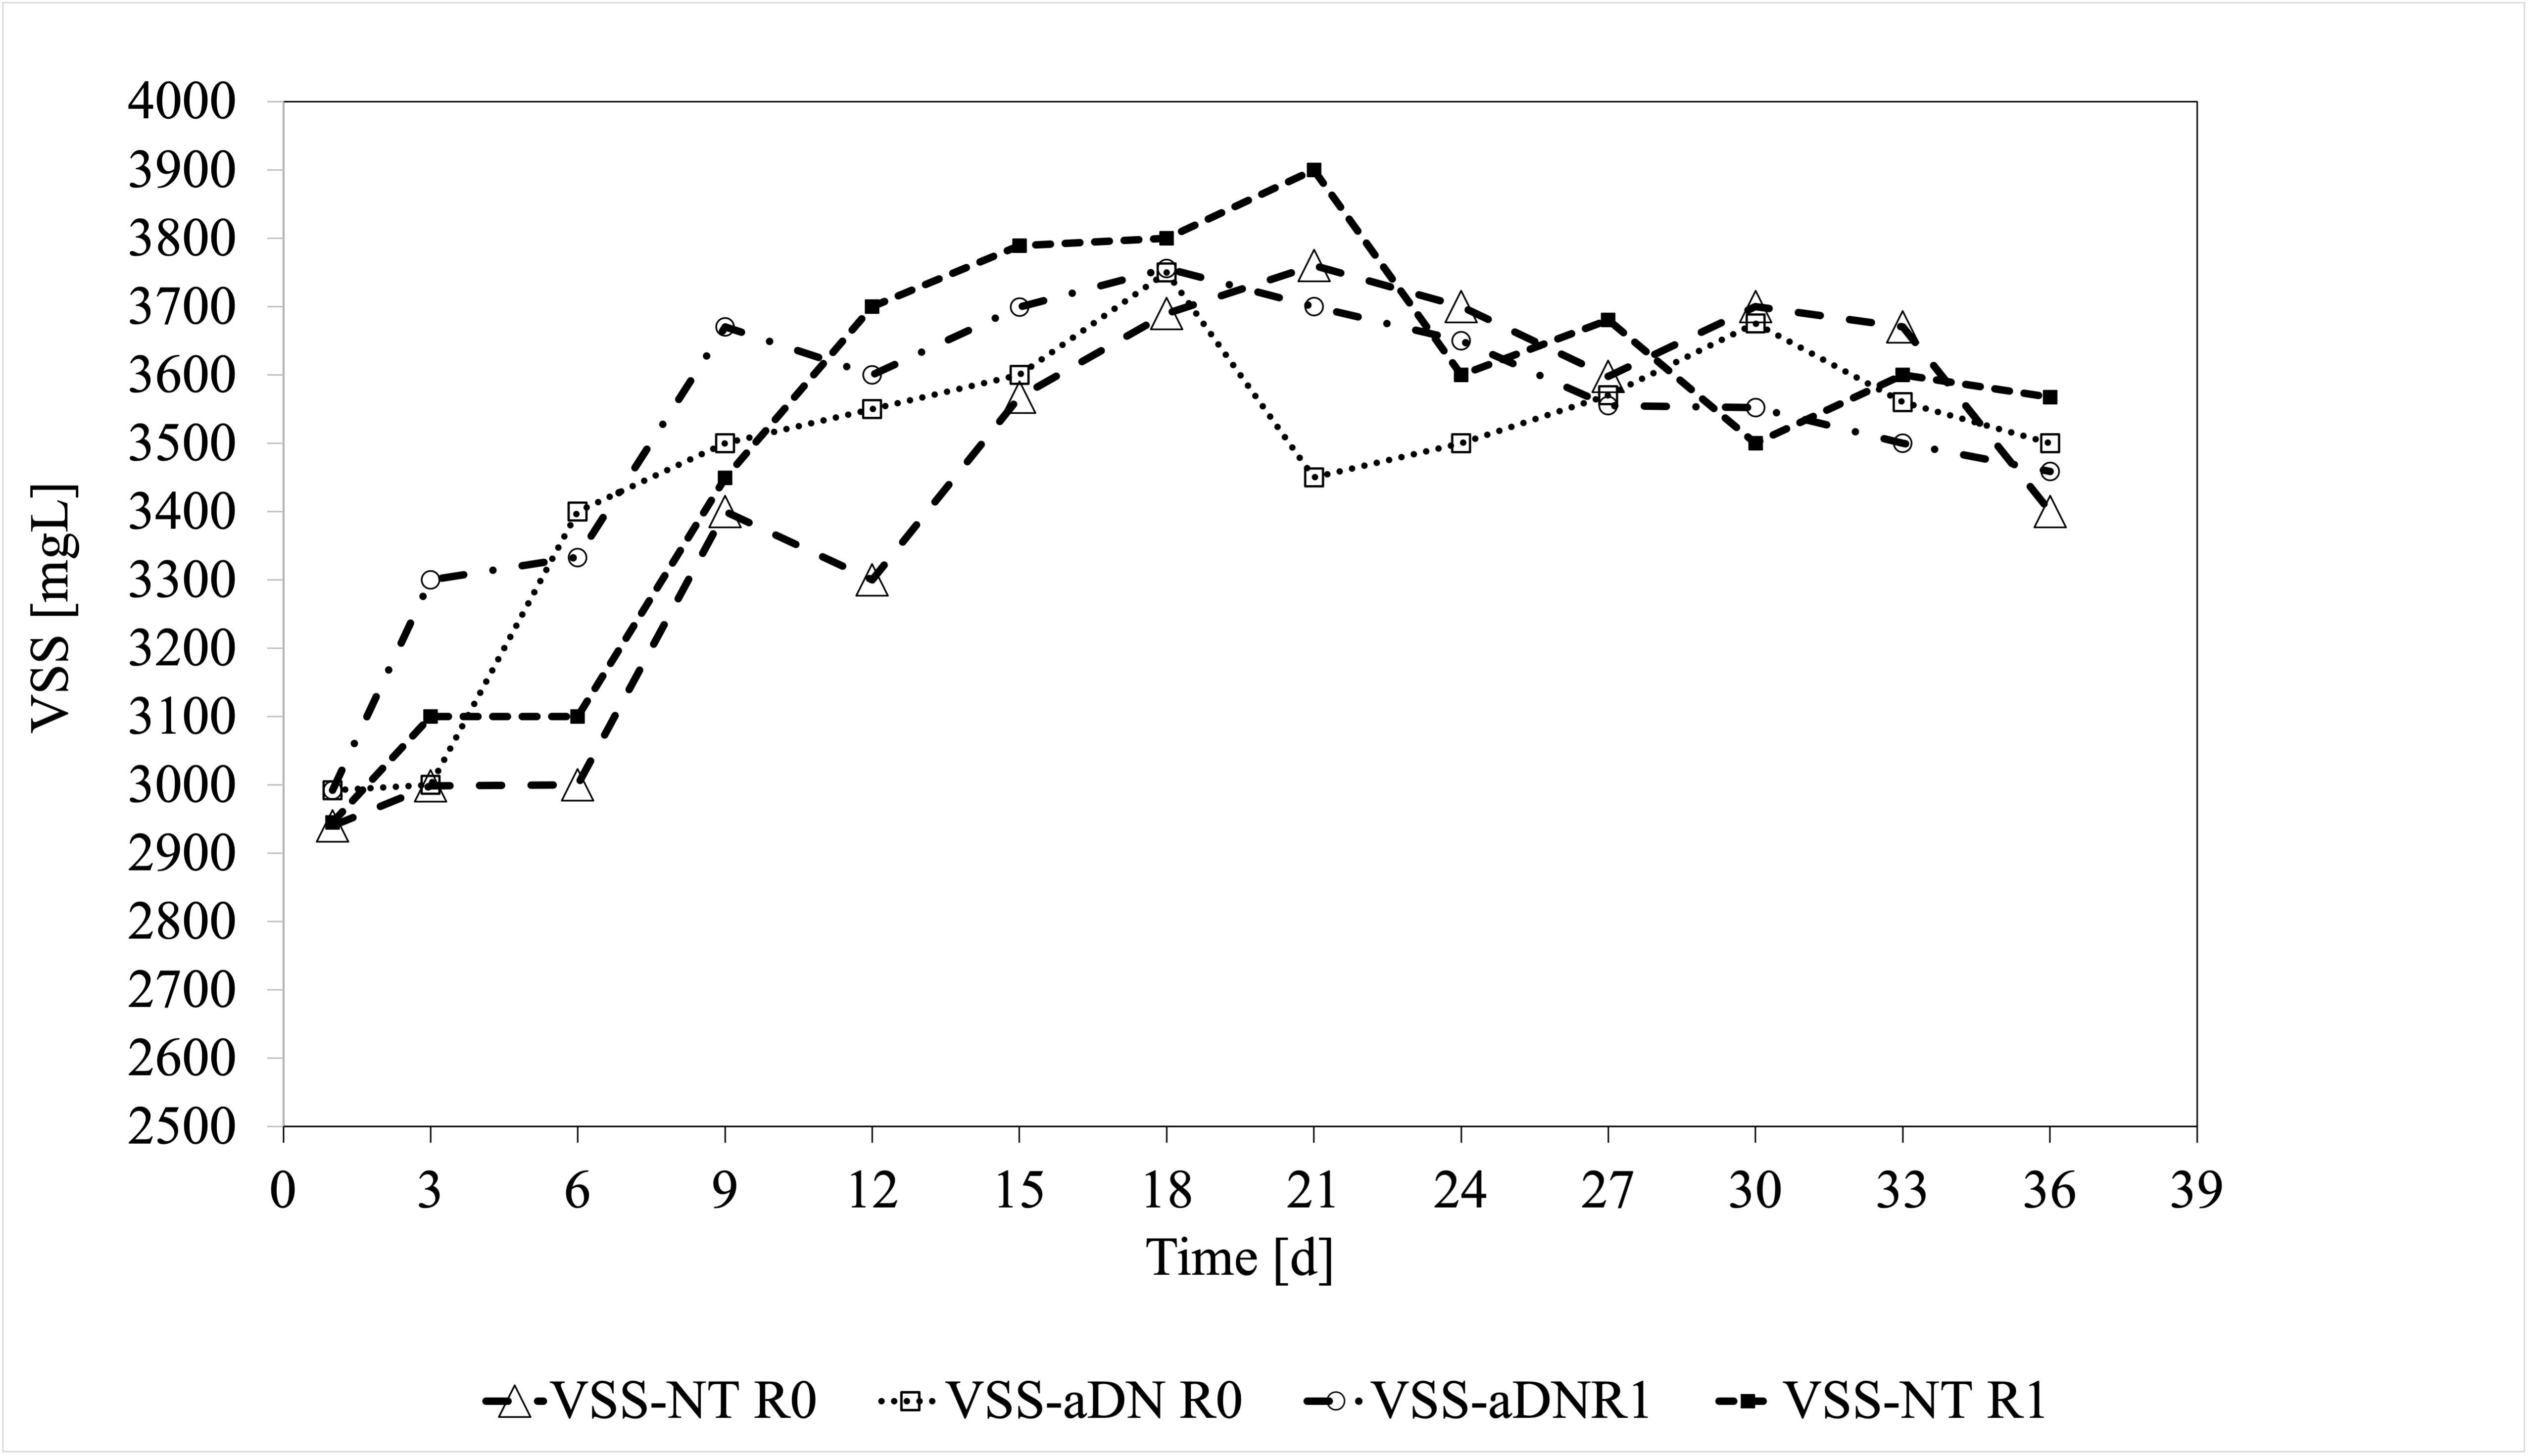

Supplement: s1 [file s1 › Figure S4.jpg]

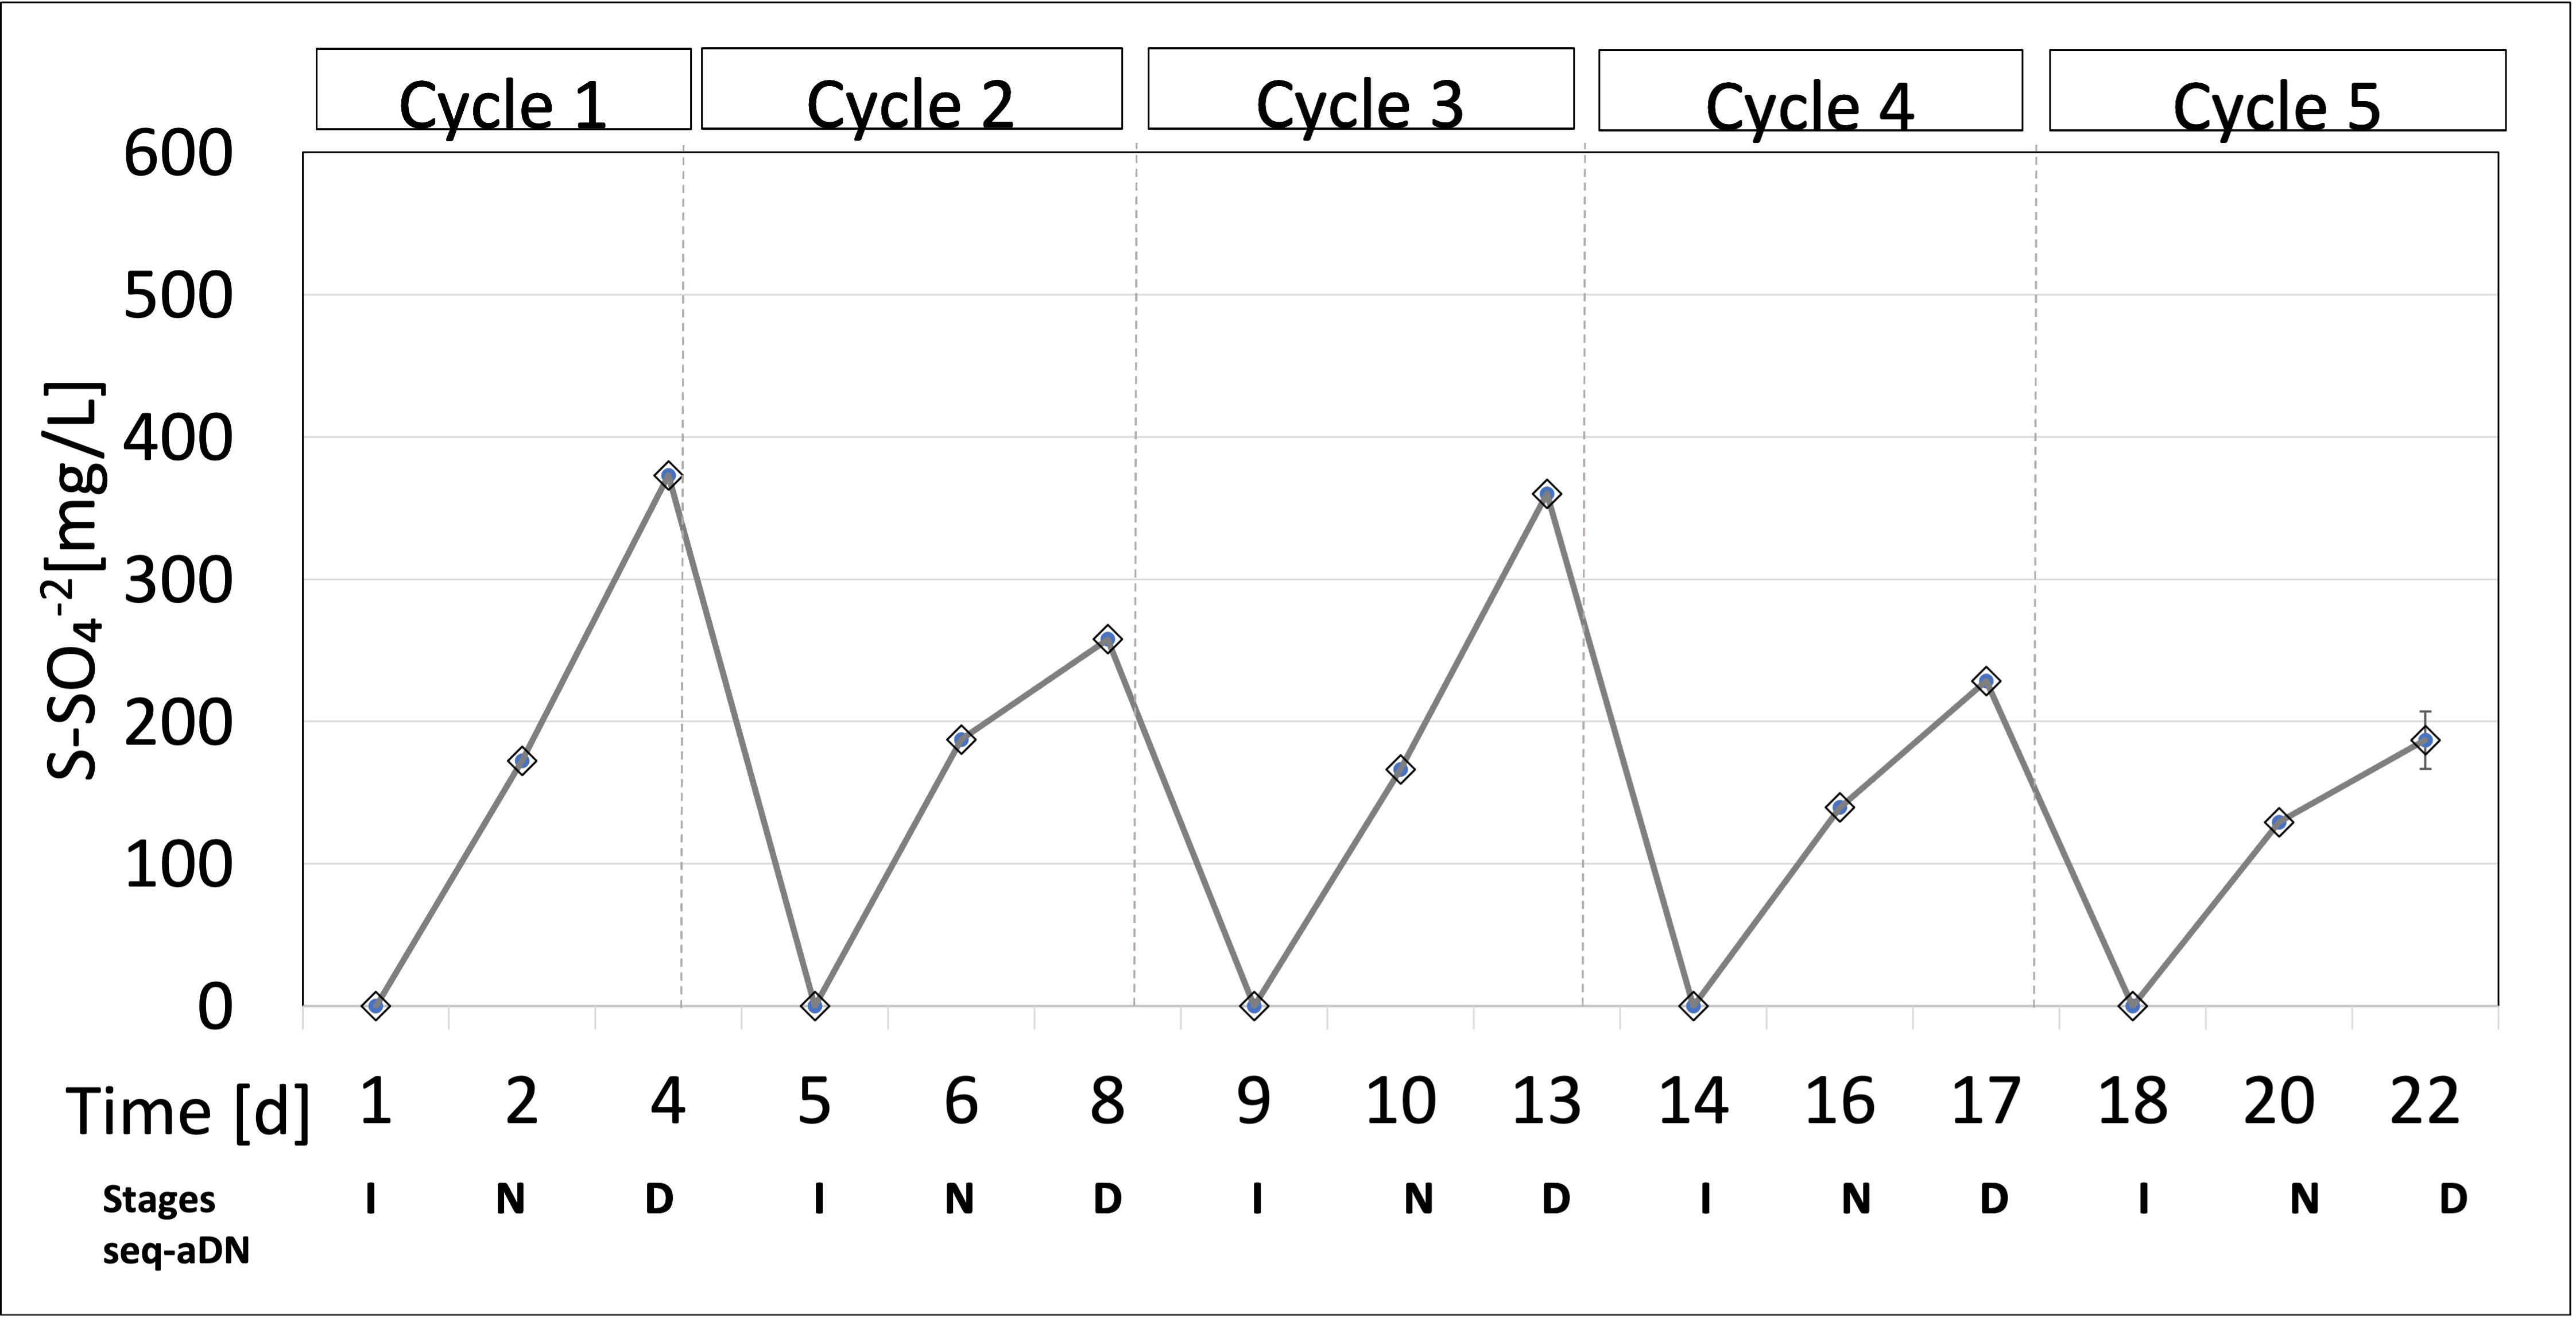

Supplement: s1 [file s1 › Figure S5.jpg]

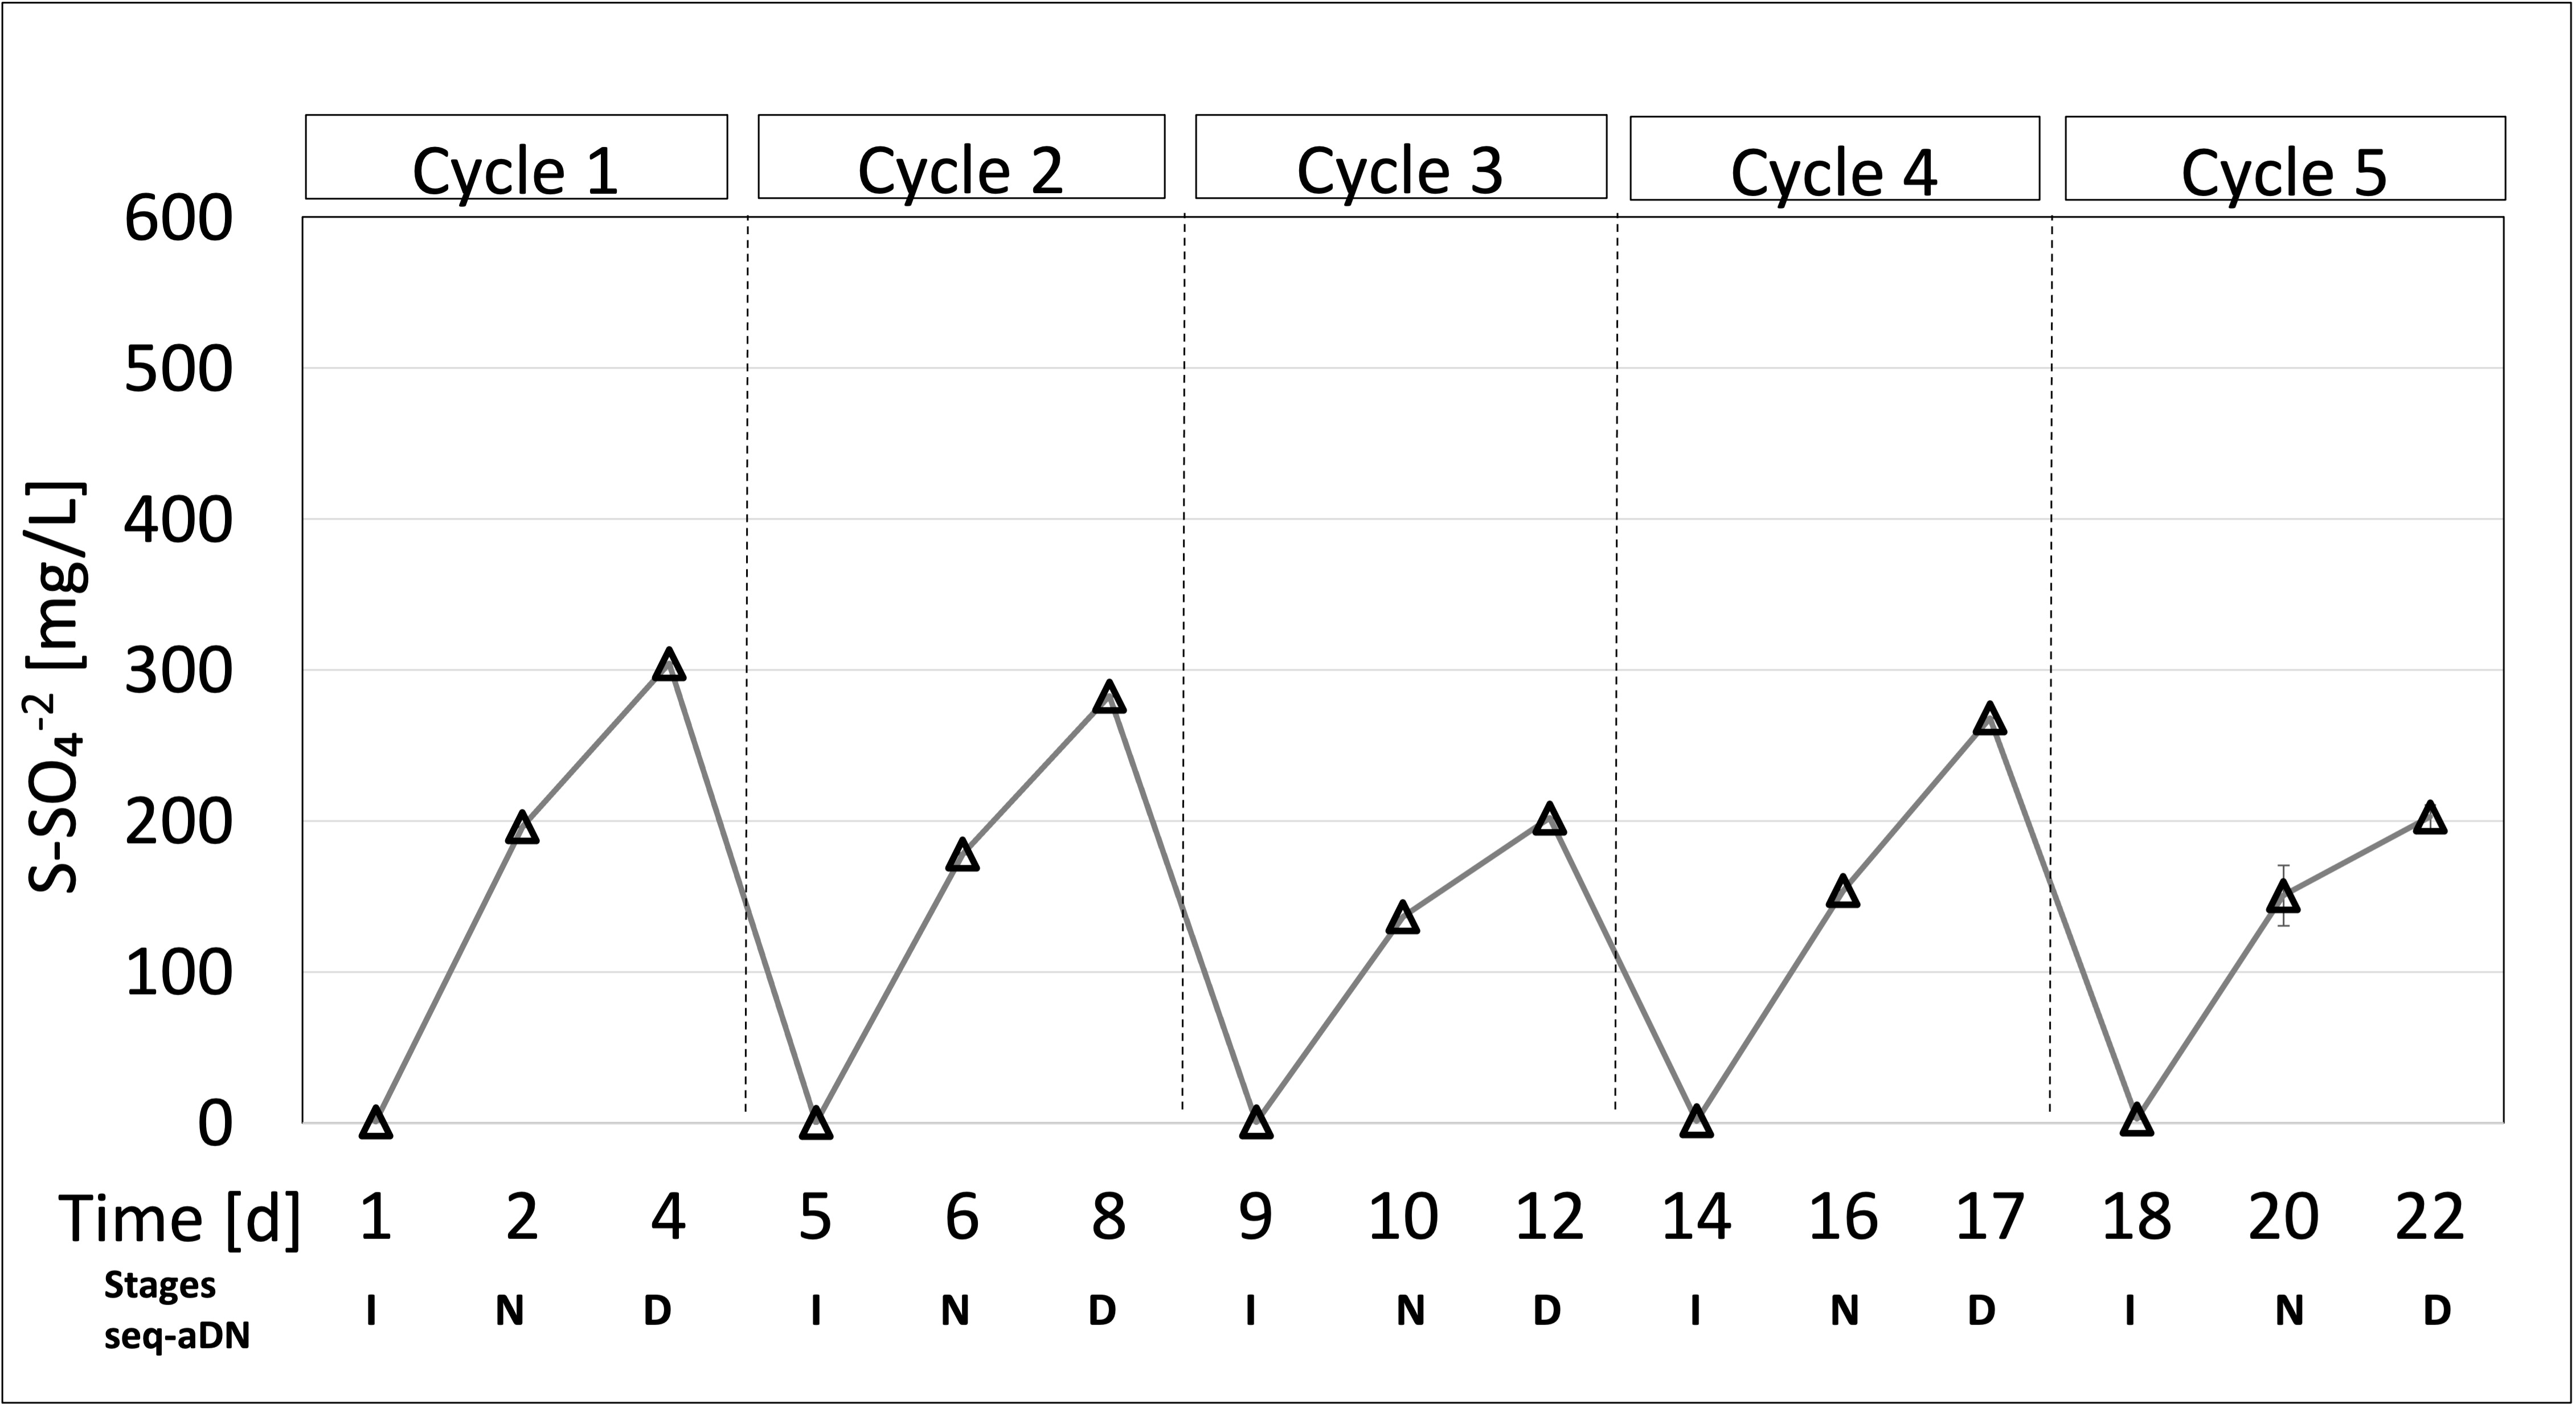

Supplement: s1 [file s1 › Figure S6.jpg]

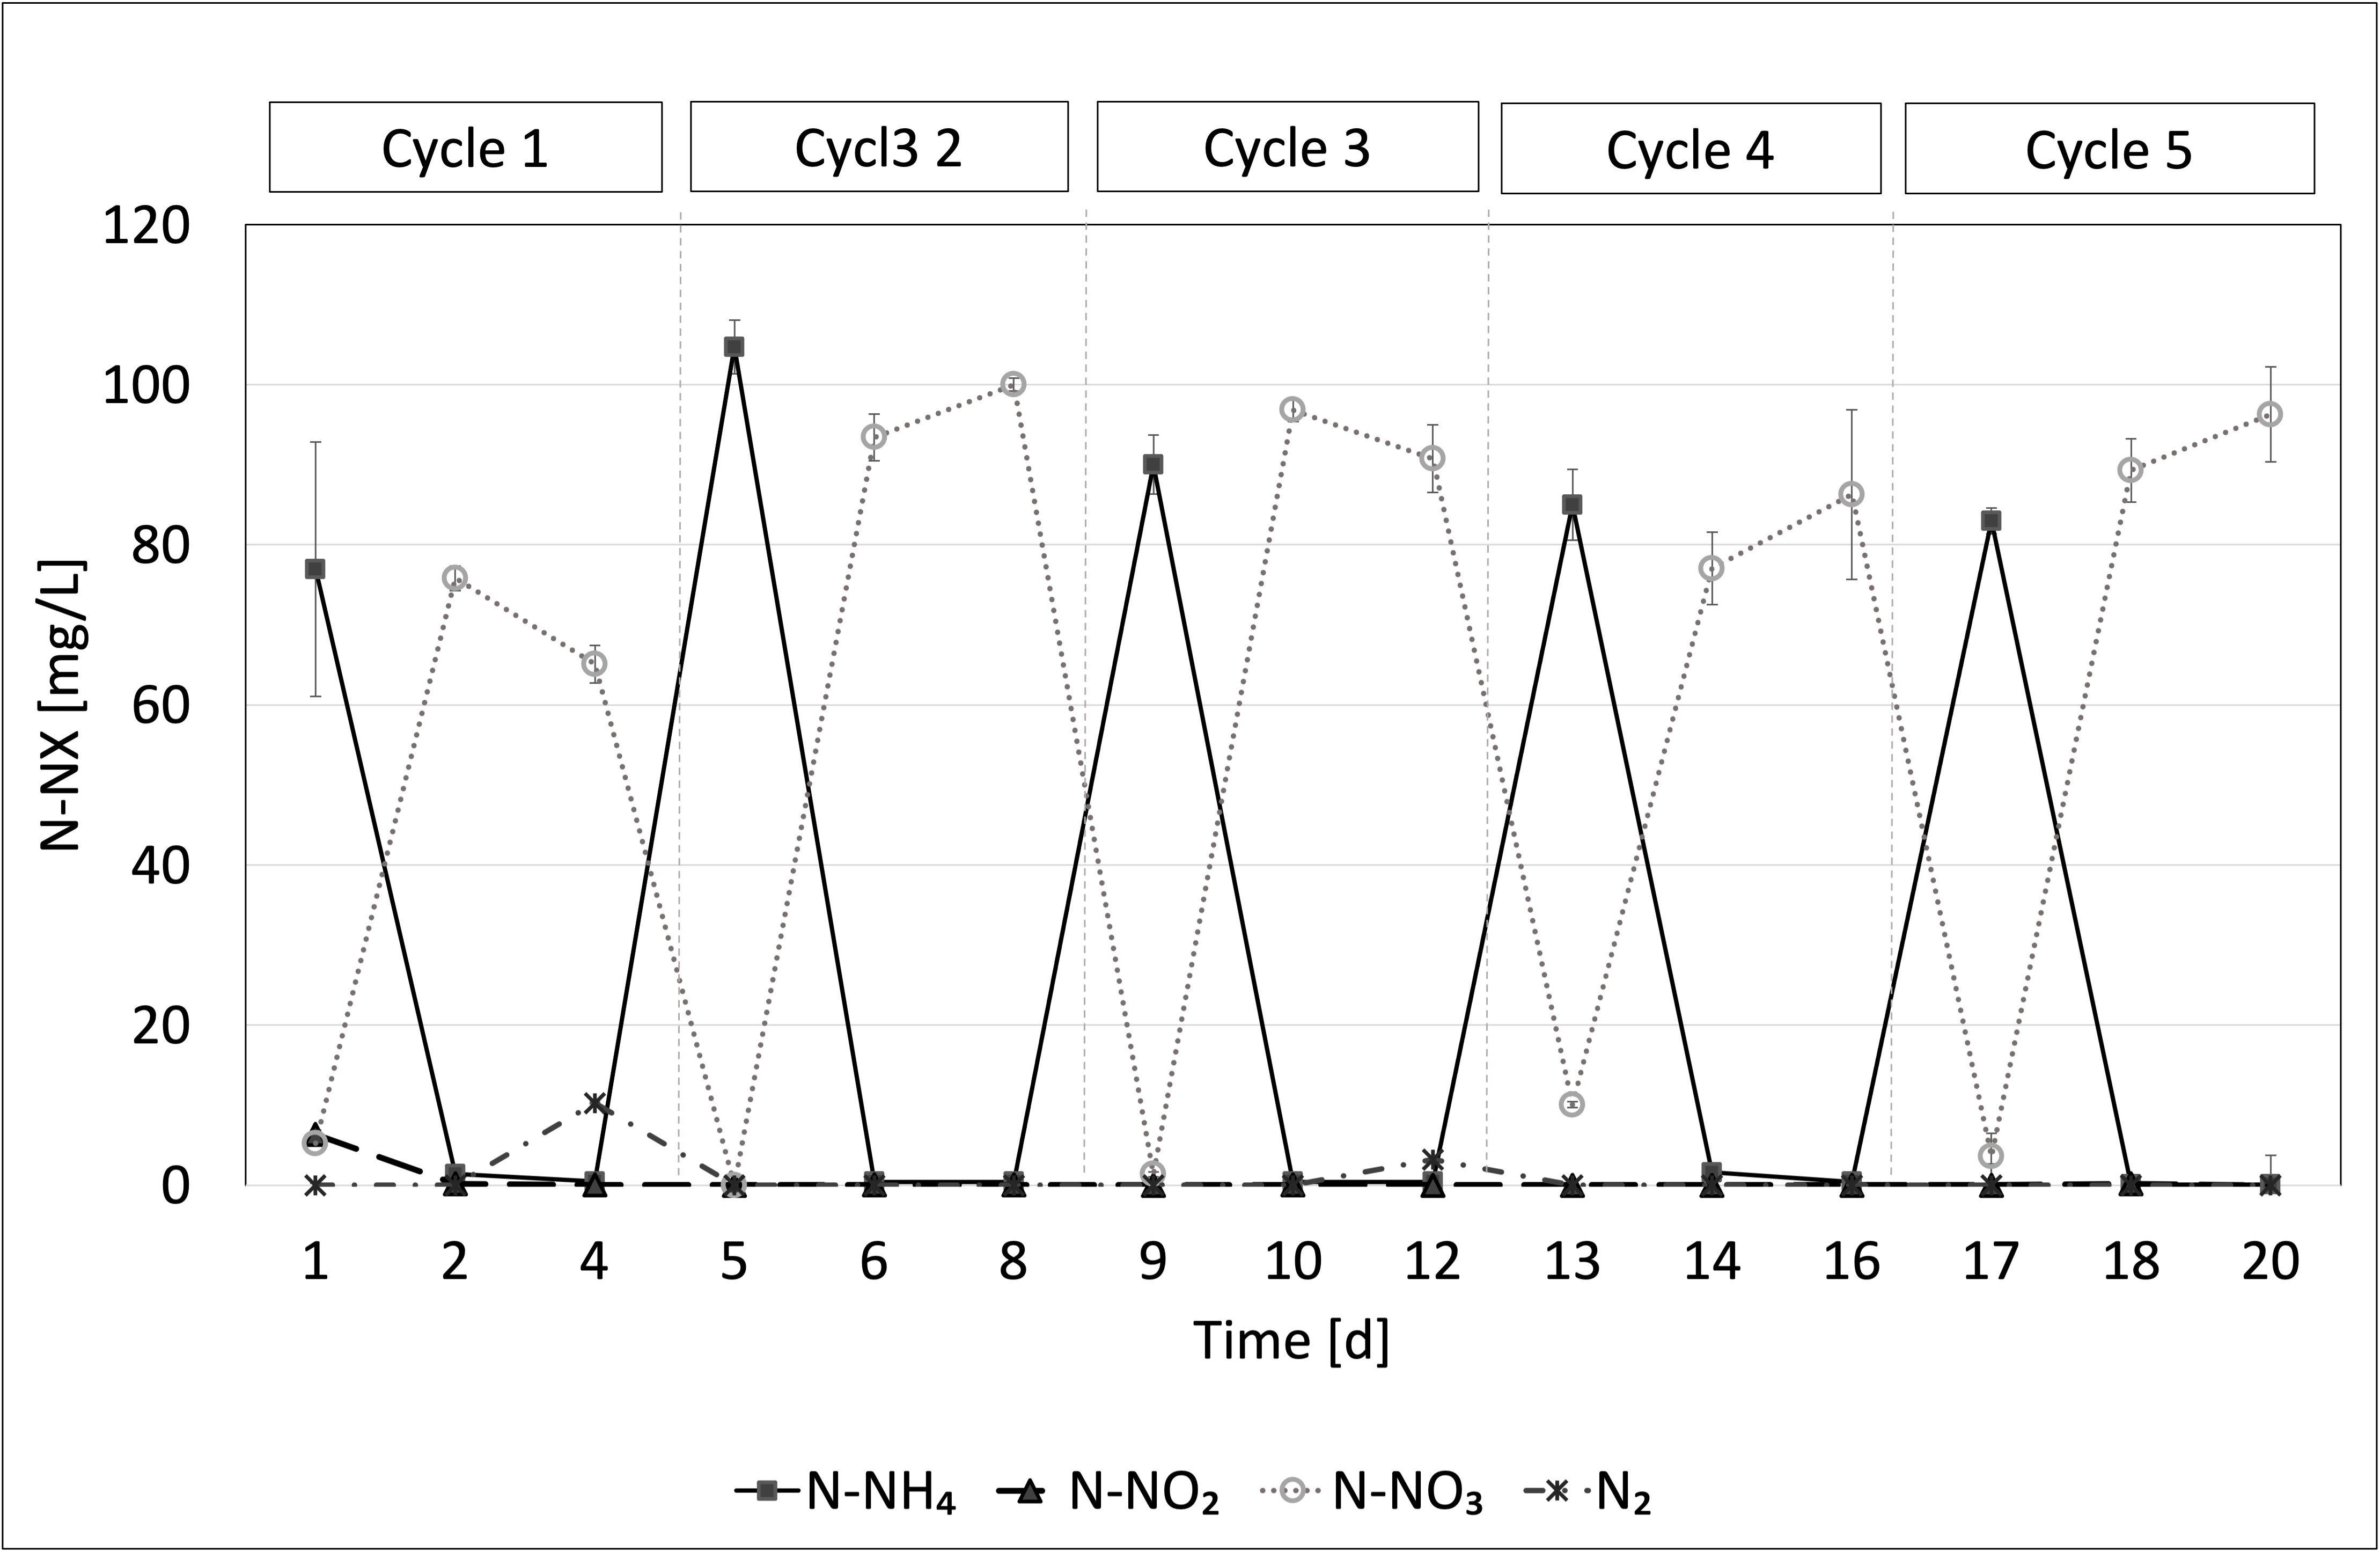

Supplement: s1 [file s1 › Figure S7.jpg]

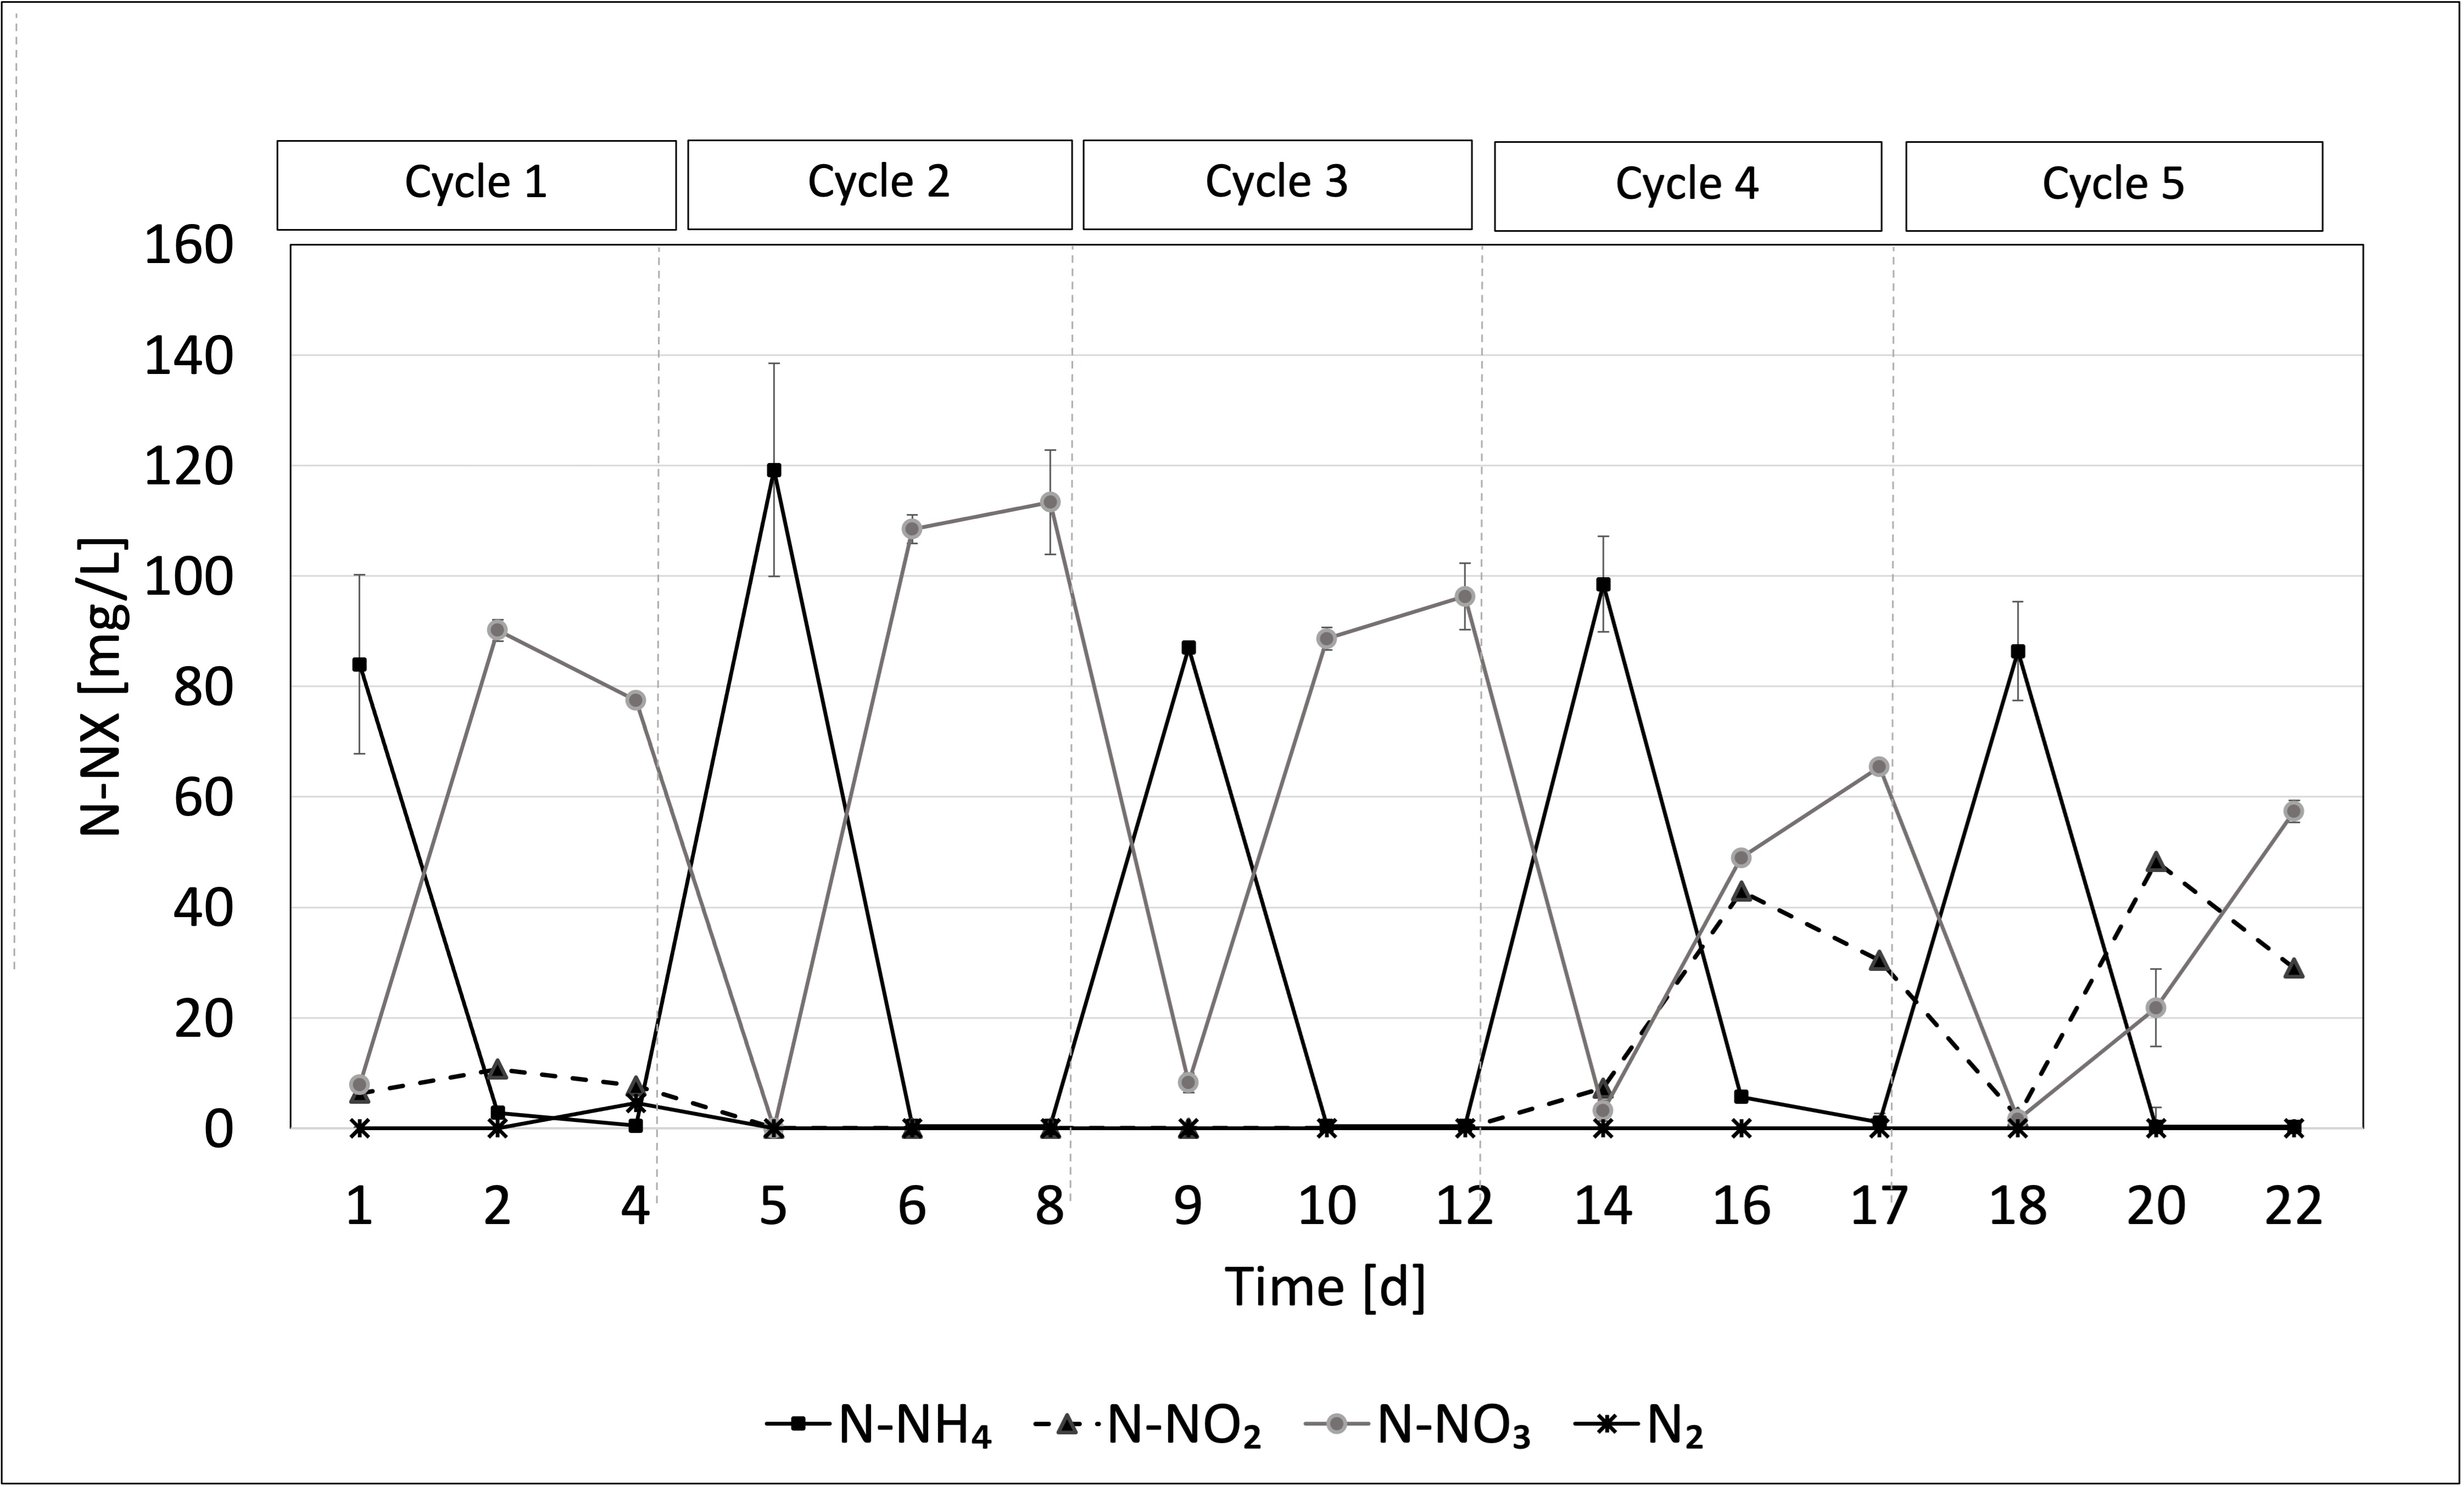

Supplement: s1 [file s1 › Figure S8.jpg]
